# Supplementary material for: An observational record of global gridded near surface air temperature change over land and ocean from 1781
Source: Copernicus journal article supplement (doi:10.5194/essd-2024-500), 2024-12-05

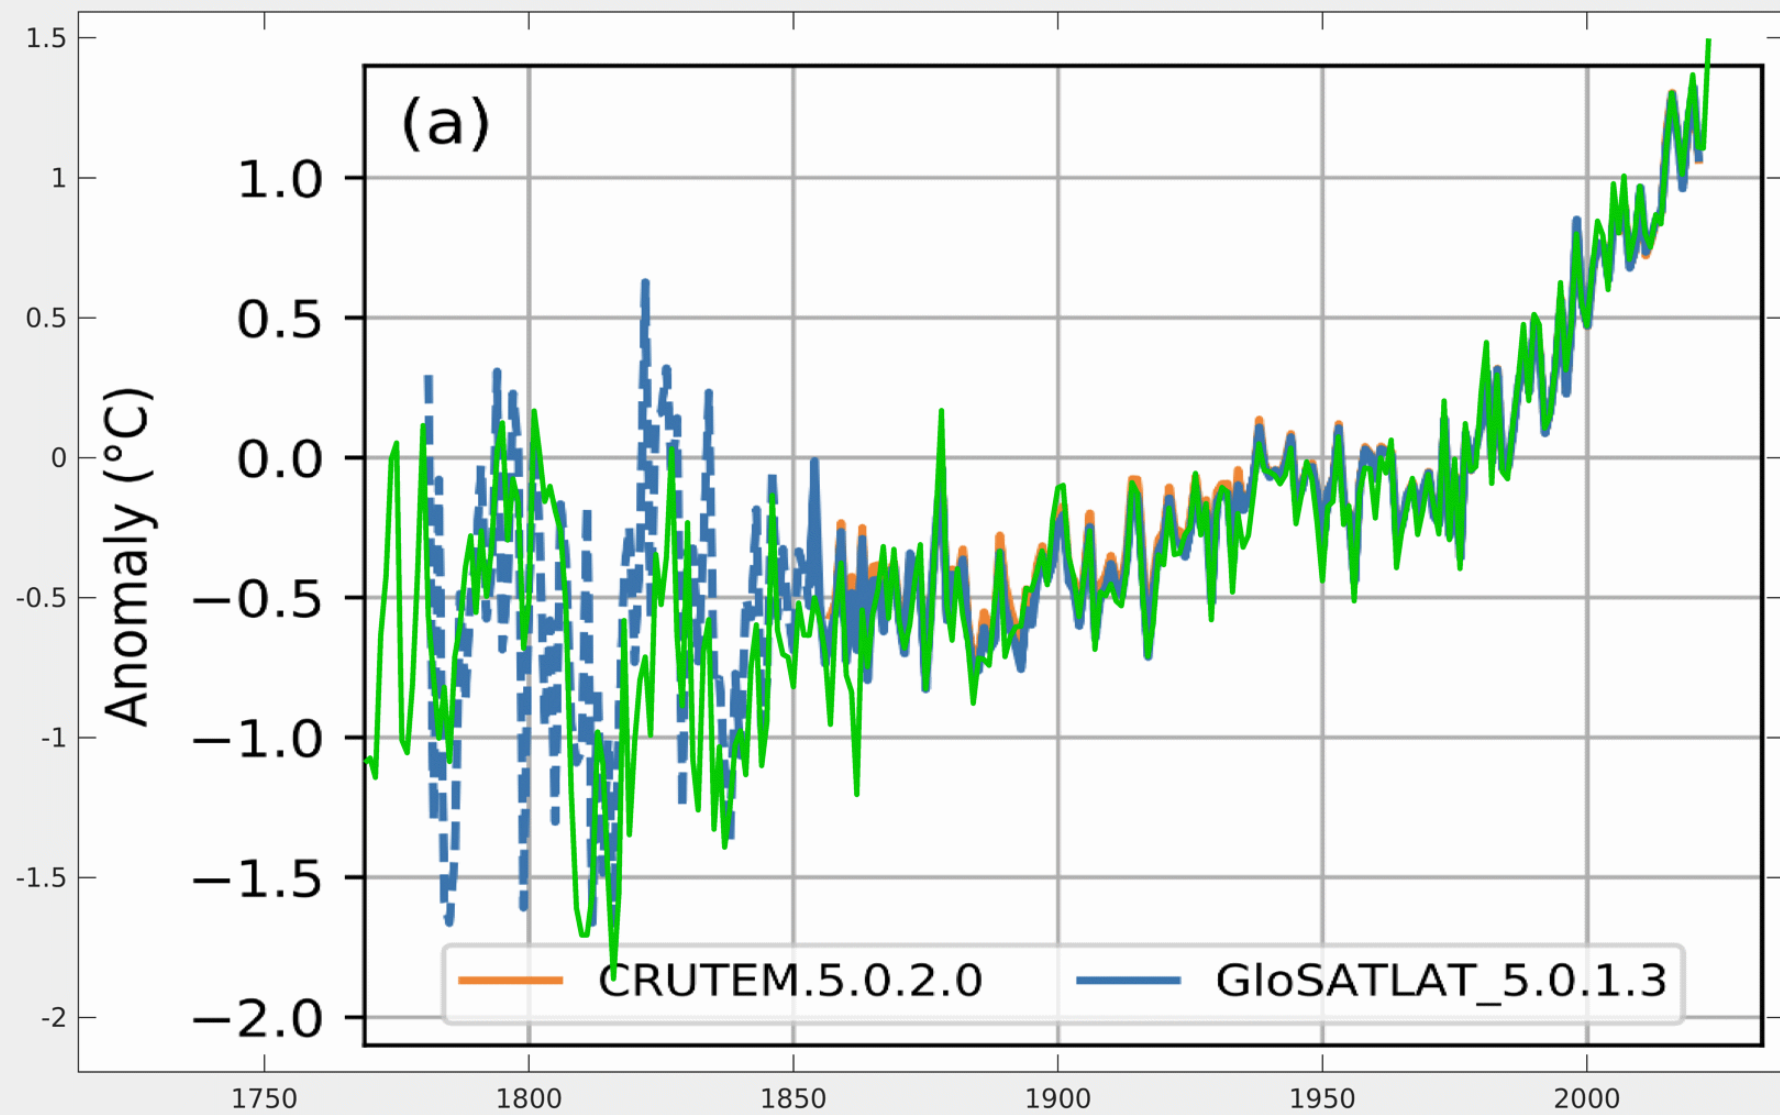

Supplement: Supplementary file [file essd-2024-500-CC4-supplement.pdf]
